# Supplementary material for: The influence of hypoxia and energy depletion on the response of endothelial cells to the vascular disrupting agent combretastatin A-4-phosphate
Source: PubMed Central journal article supplement (PMC7303175; doi:10.1038/s41598-020-66568-8), 2020-06-18

**The influence of hypoxia and energy depletion on  
the response of endothelial cells to the vascular  
disrupting agent combretastatin A-4-phosphate**

Toby Holmes, Andrew W. Brown<sup>^</sup>, Marie Suggitt, Lucy  
A. Shaw, Lucy Simpson, Joseph P. A. Harrity<sup>^</sup>, Gillian  
M. Tozer\* and Chryso Kanthou\*.

Figure 1a

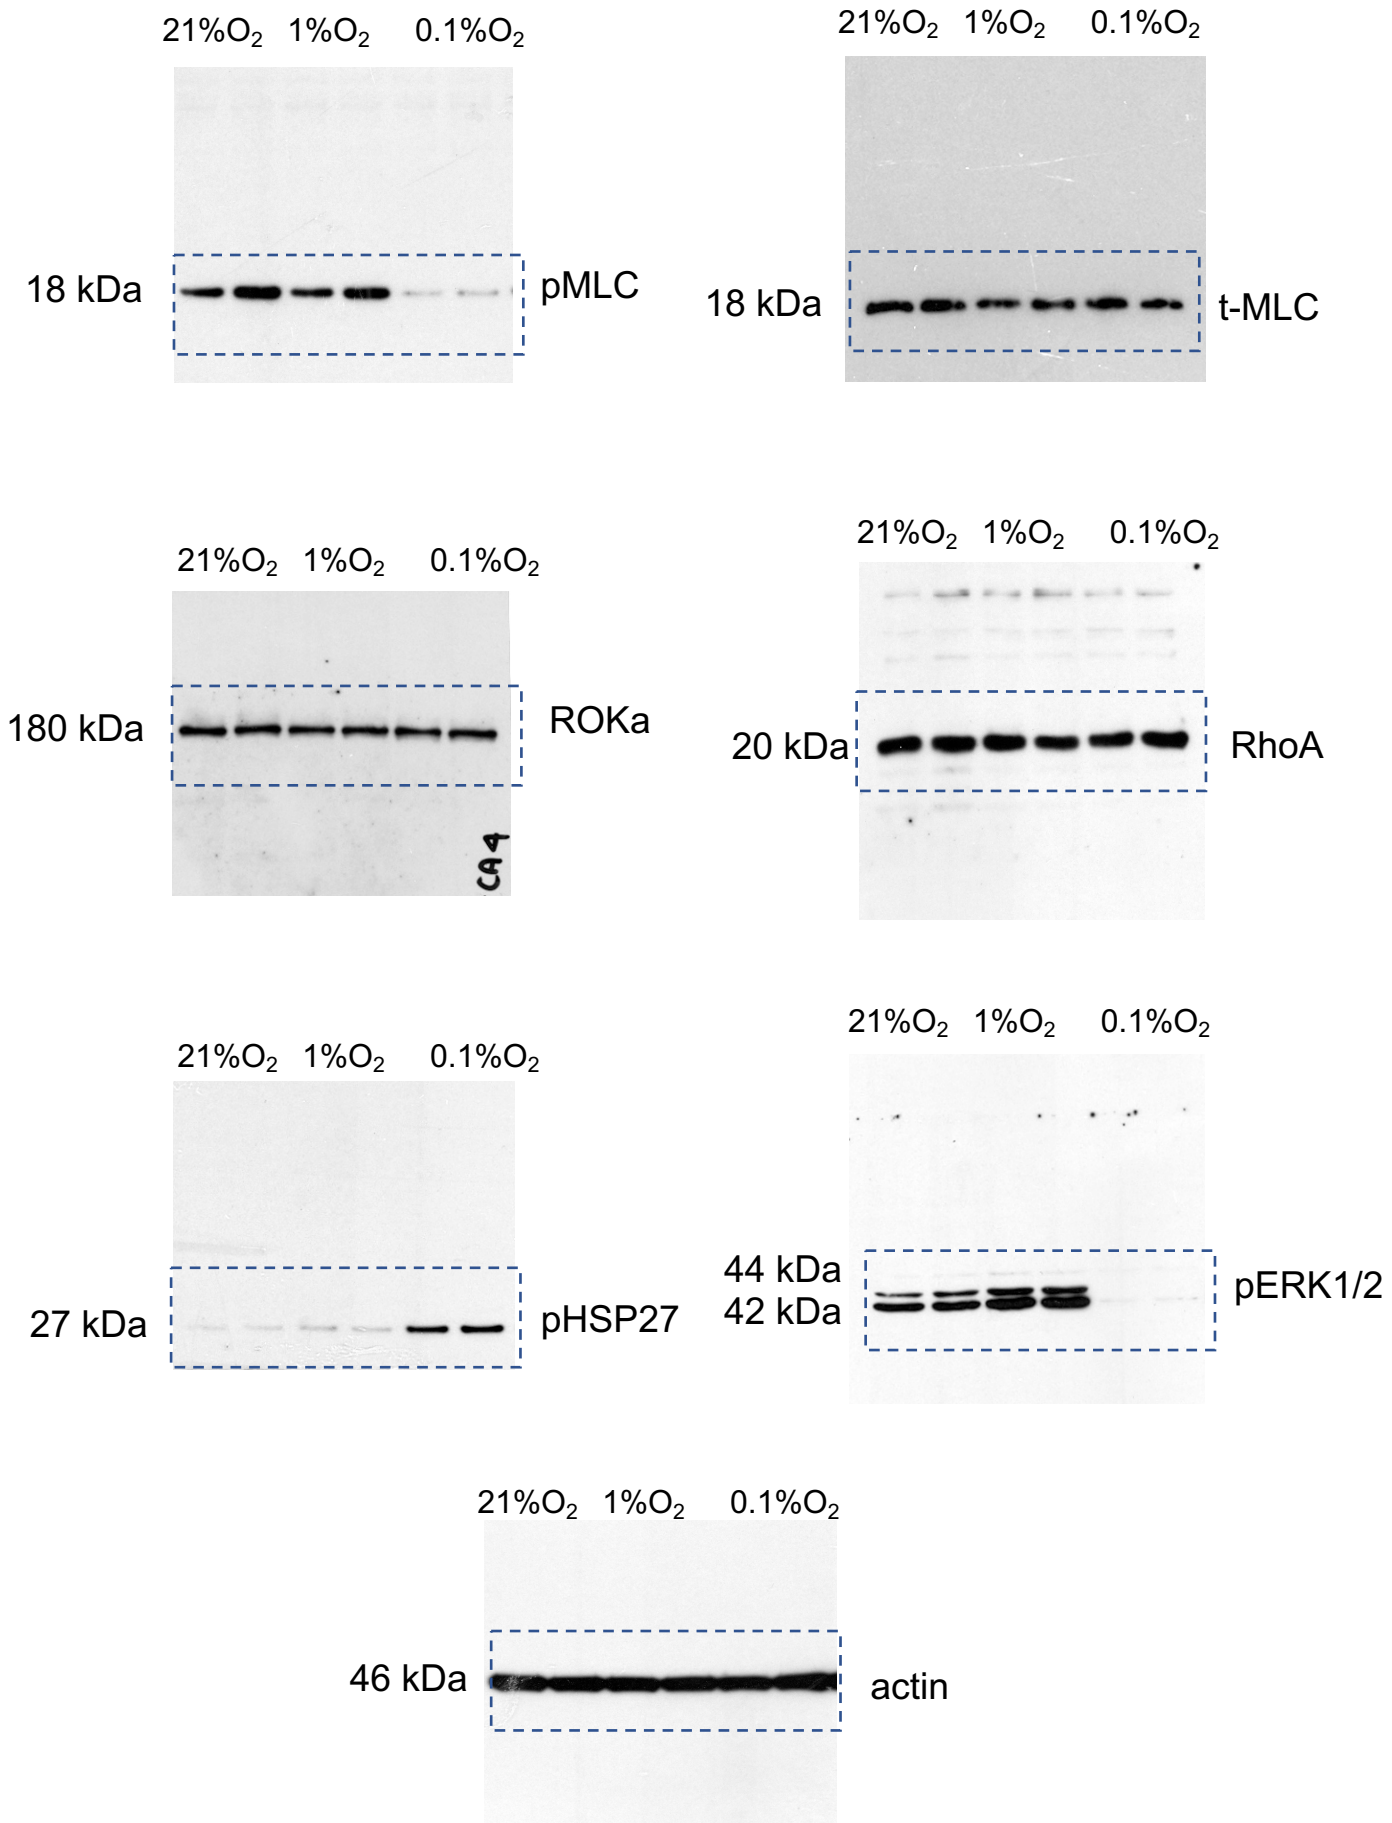

Figure 1c

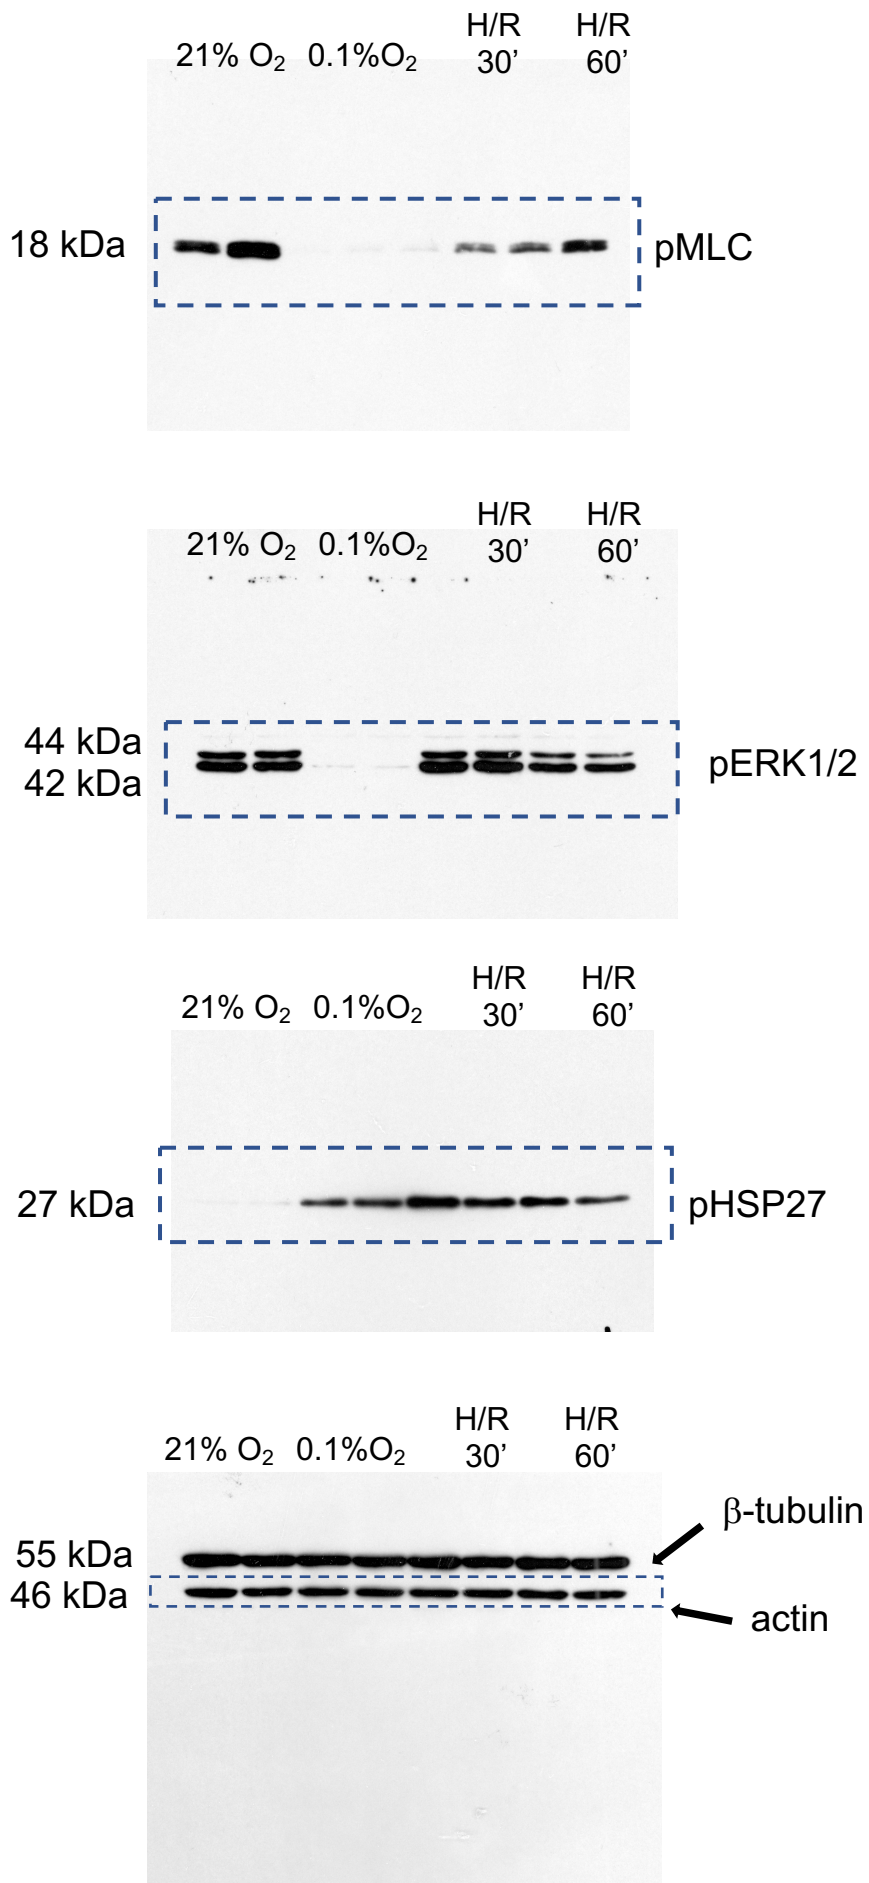

Figure 1d

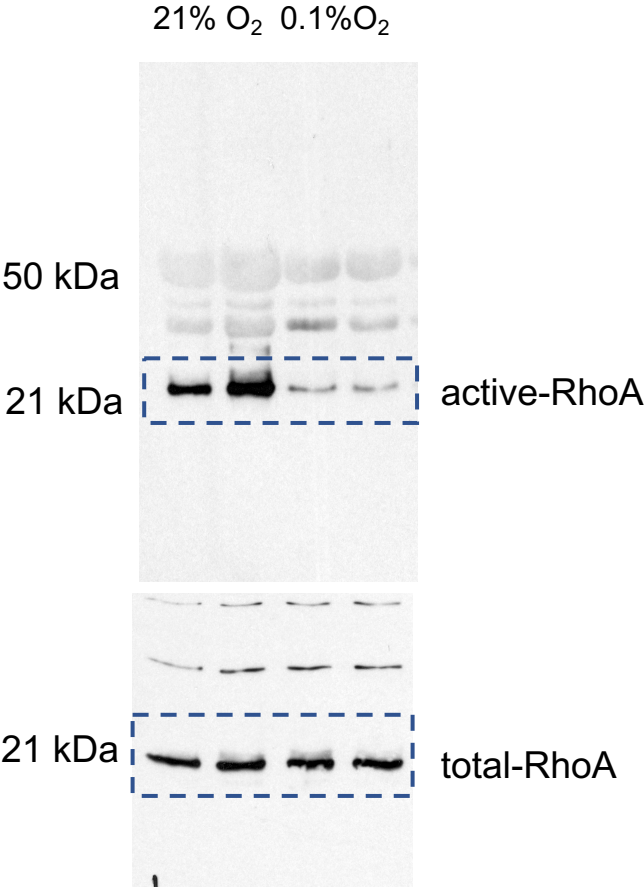

Figure 4a

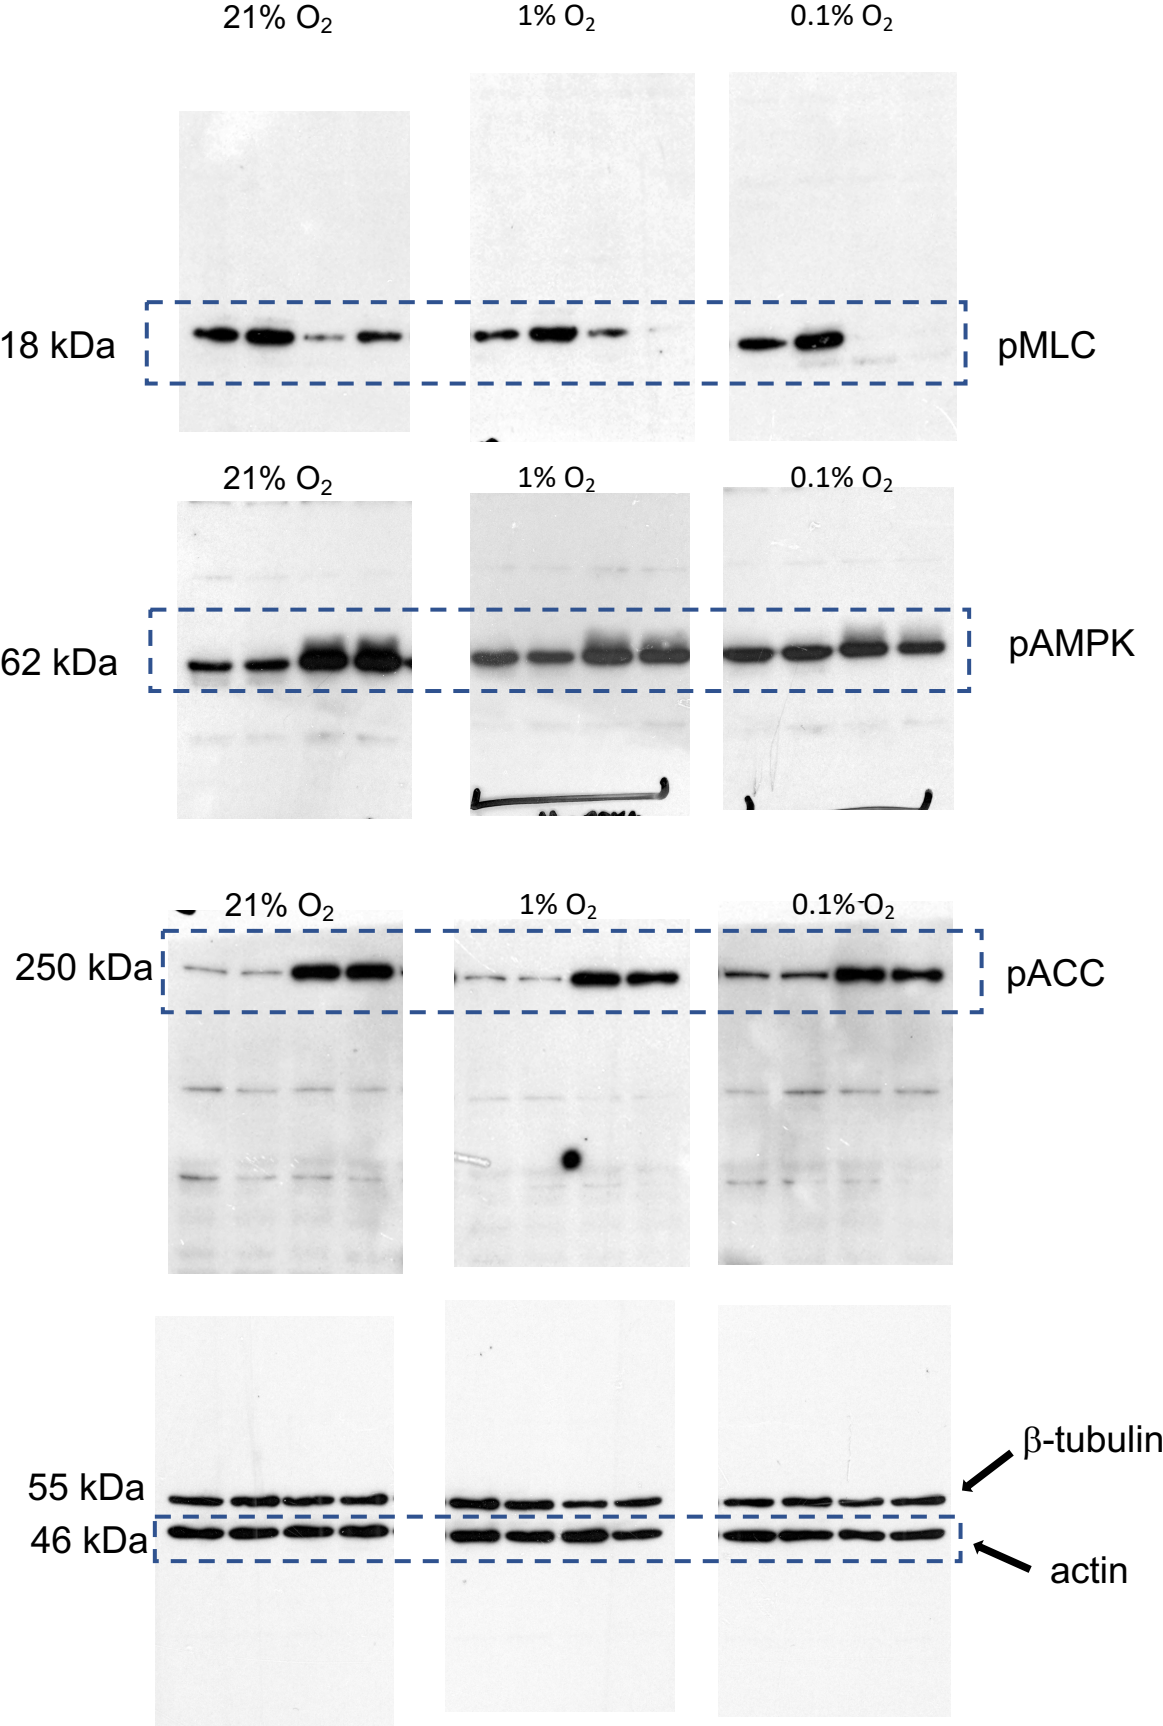

Figure 5a left panel

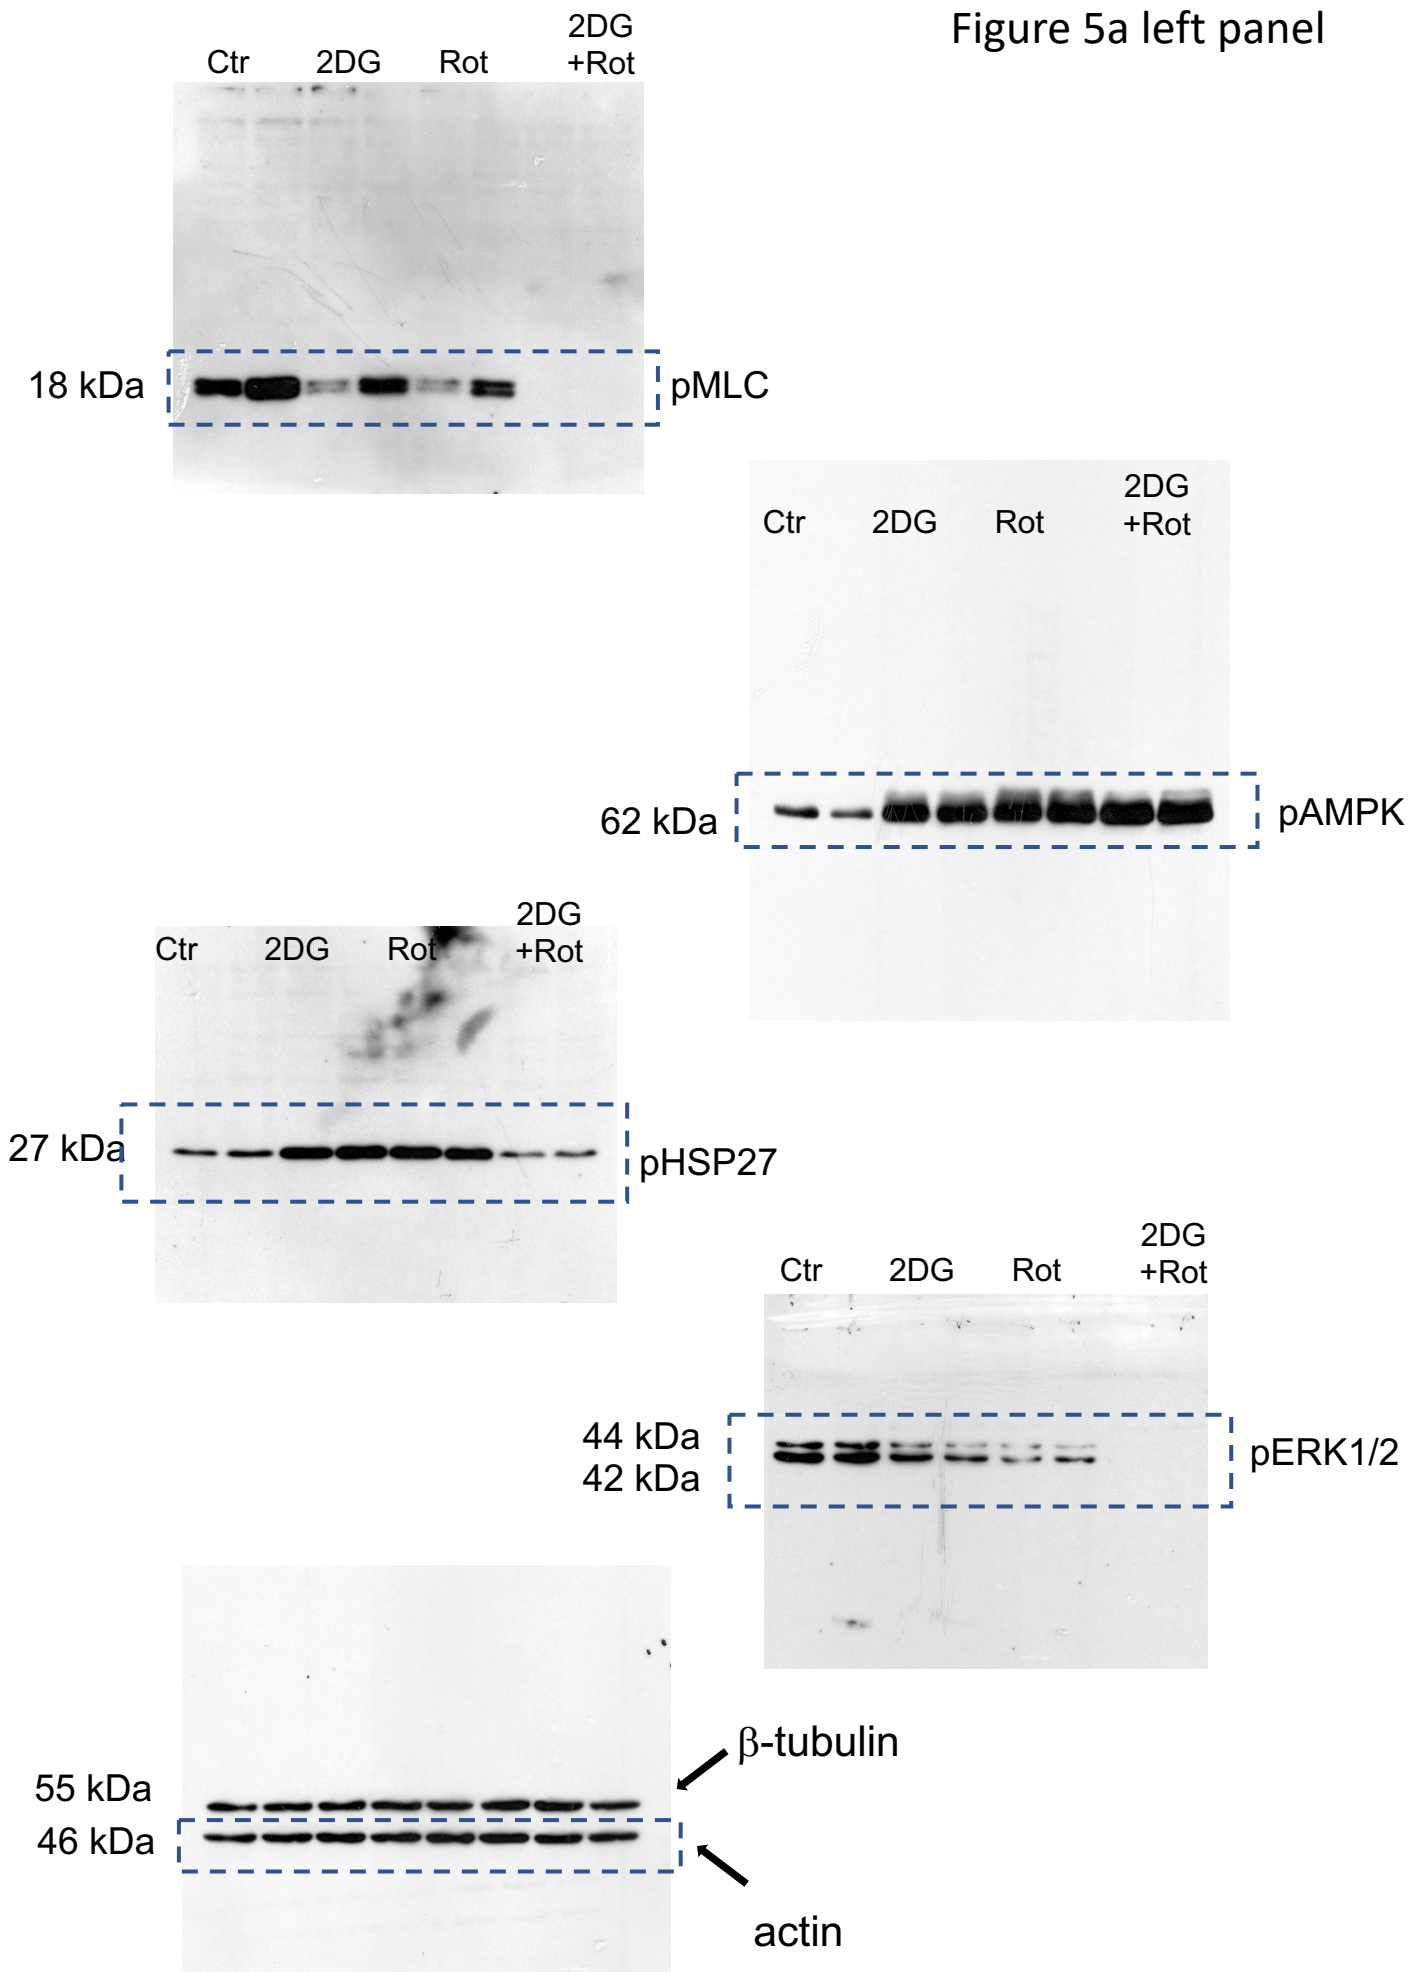

Figure 5a right panel

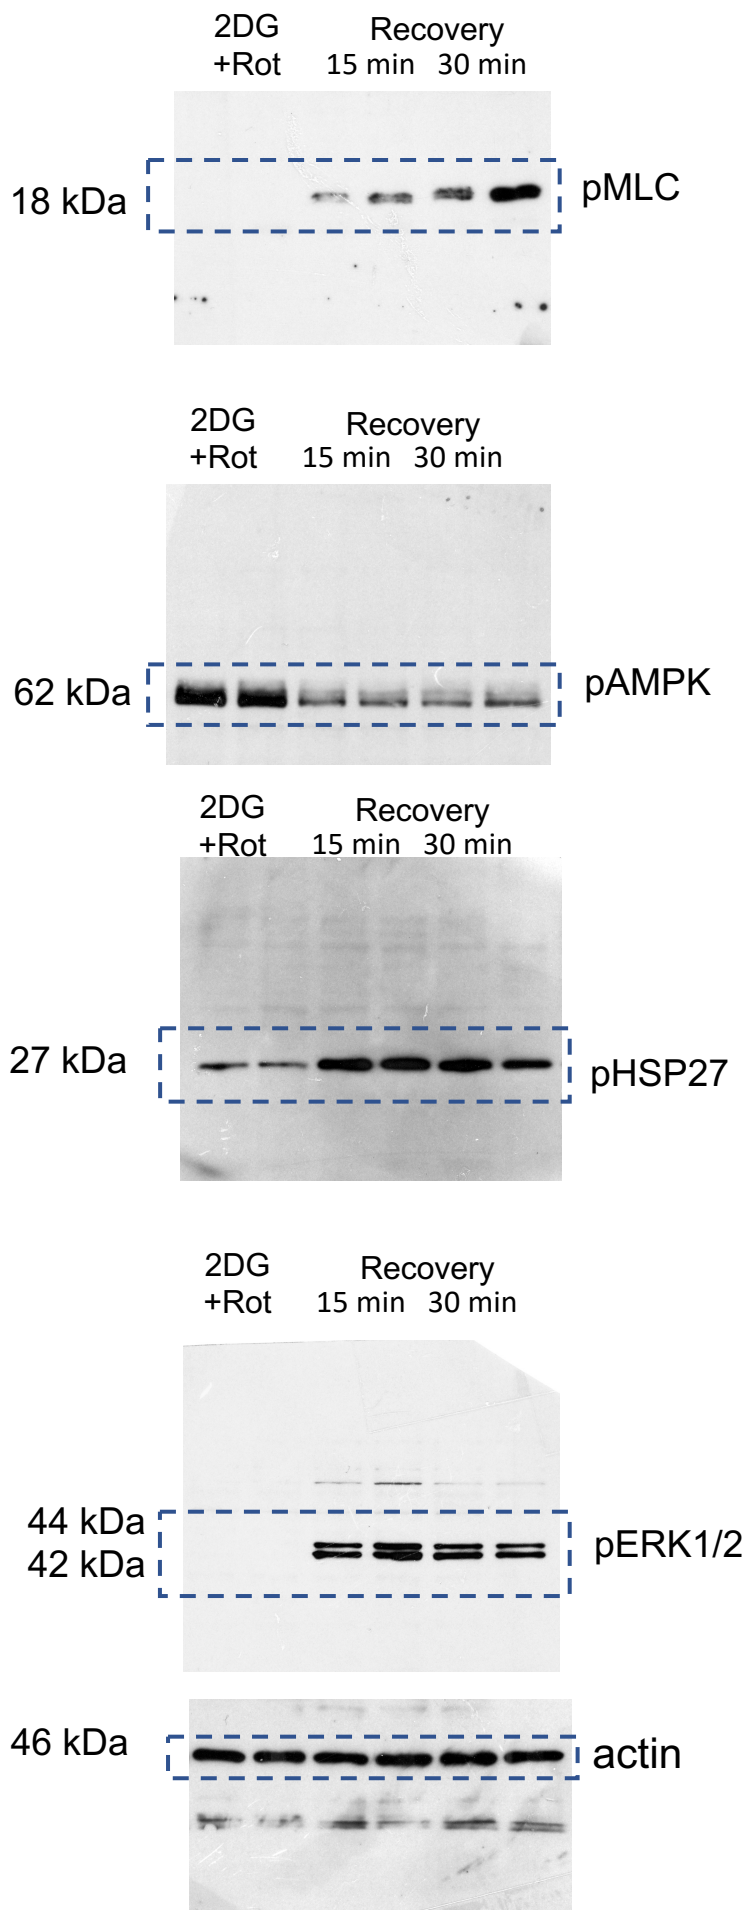

Figure 5c

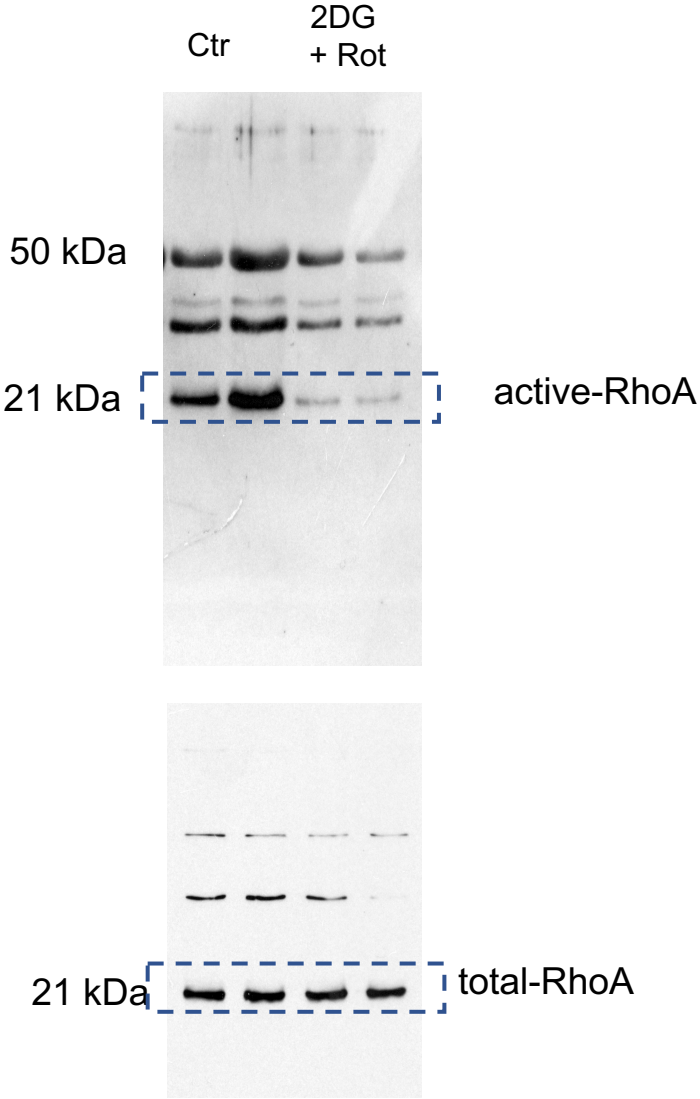



Figure 7a – left panel

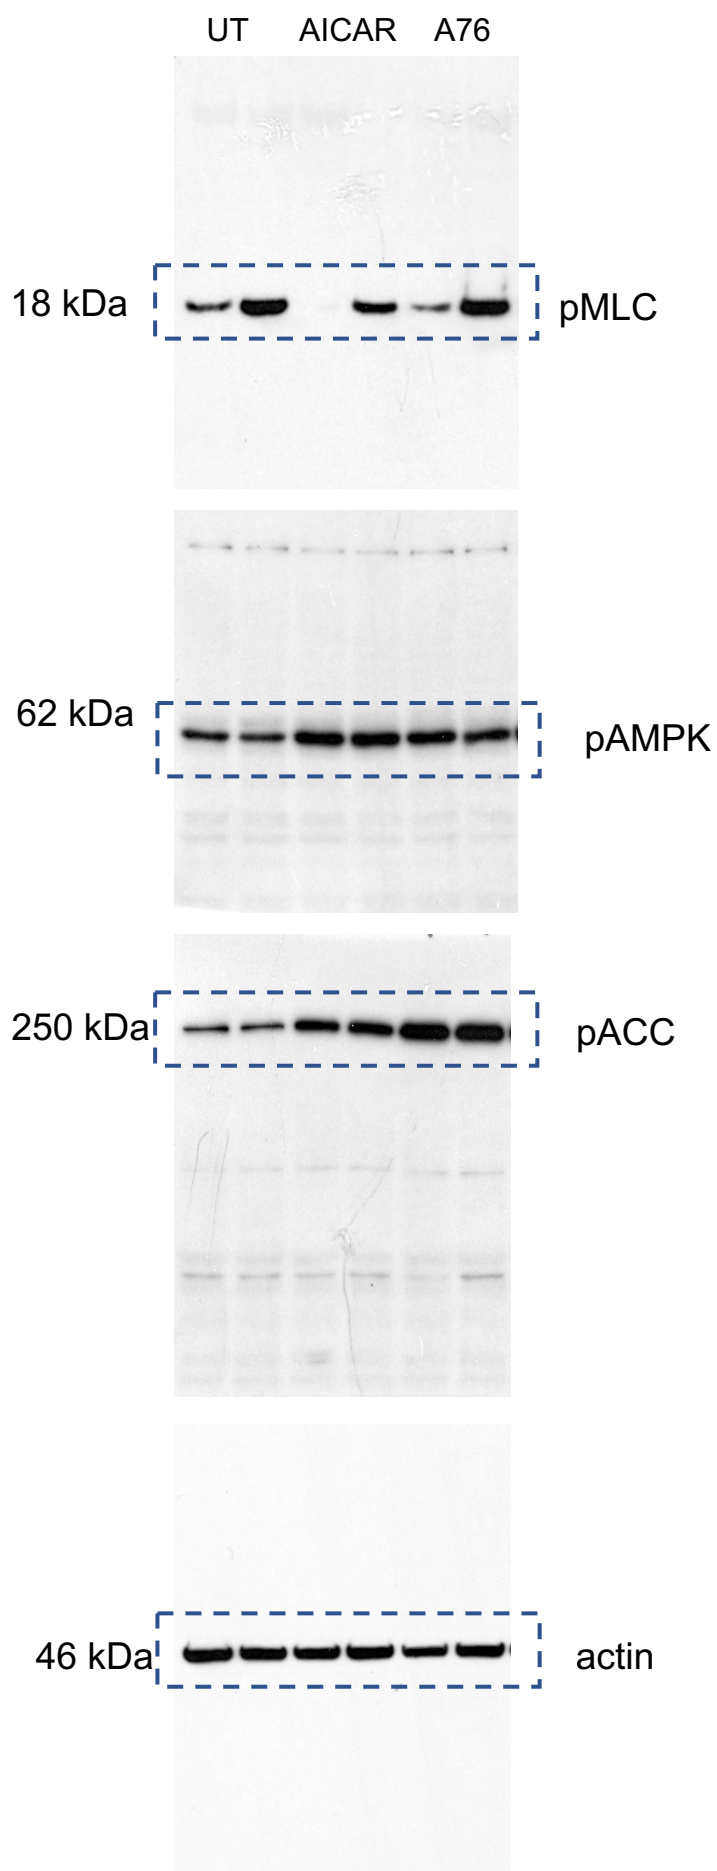

Figure 7a – right panel

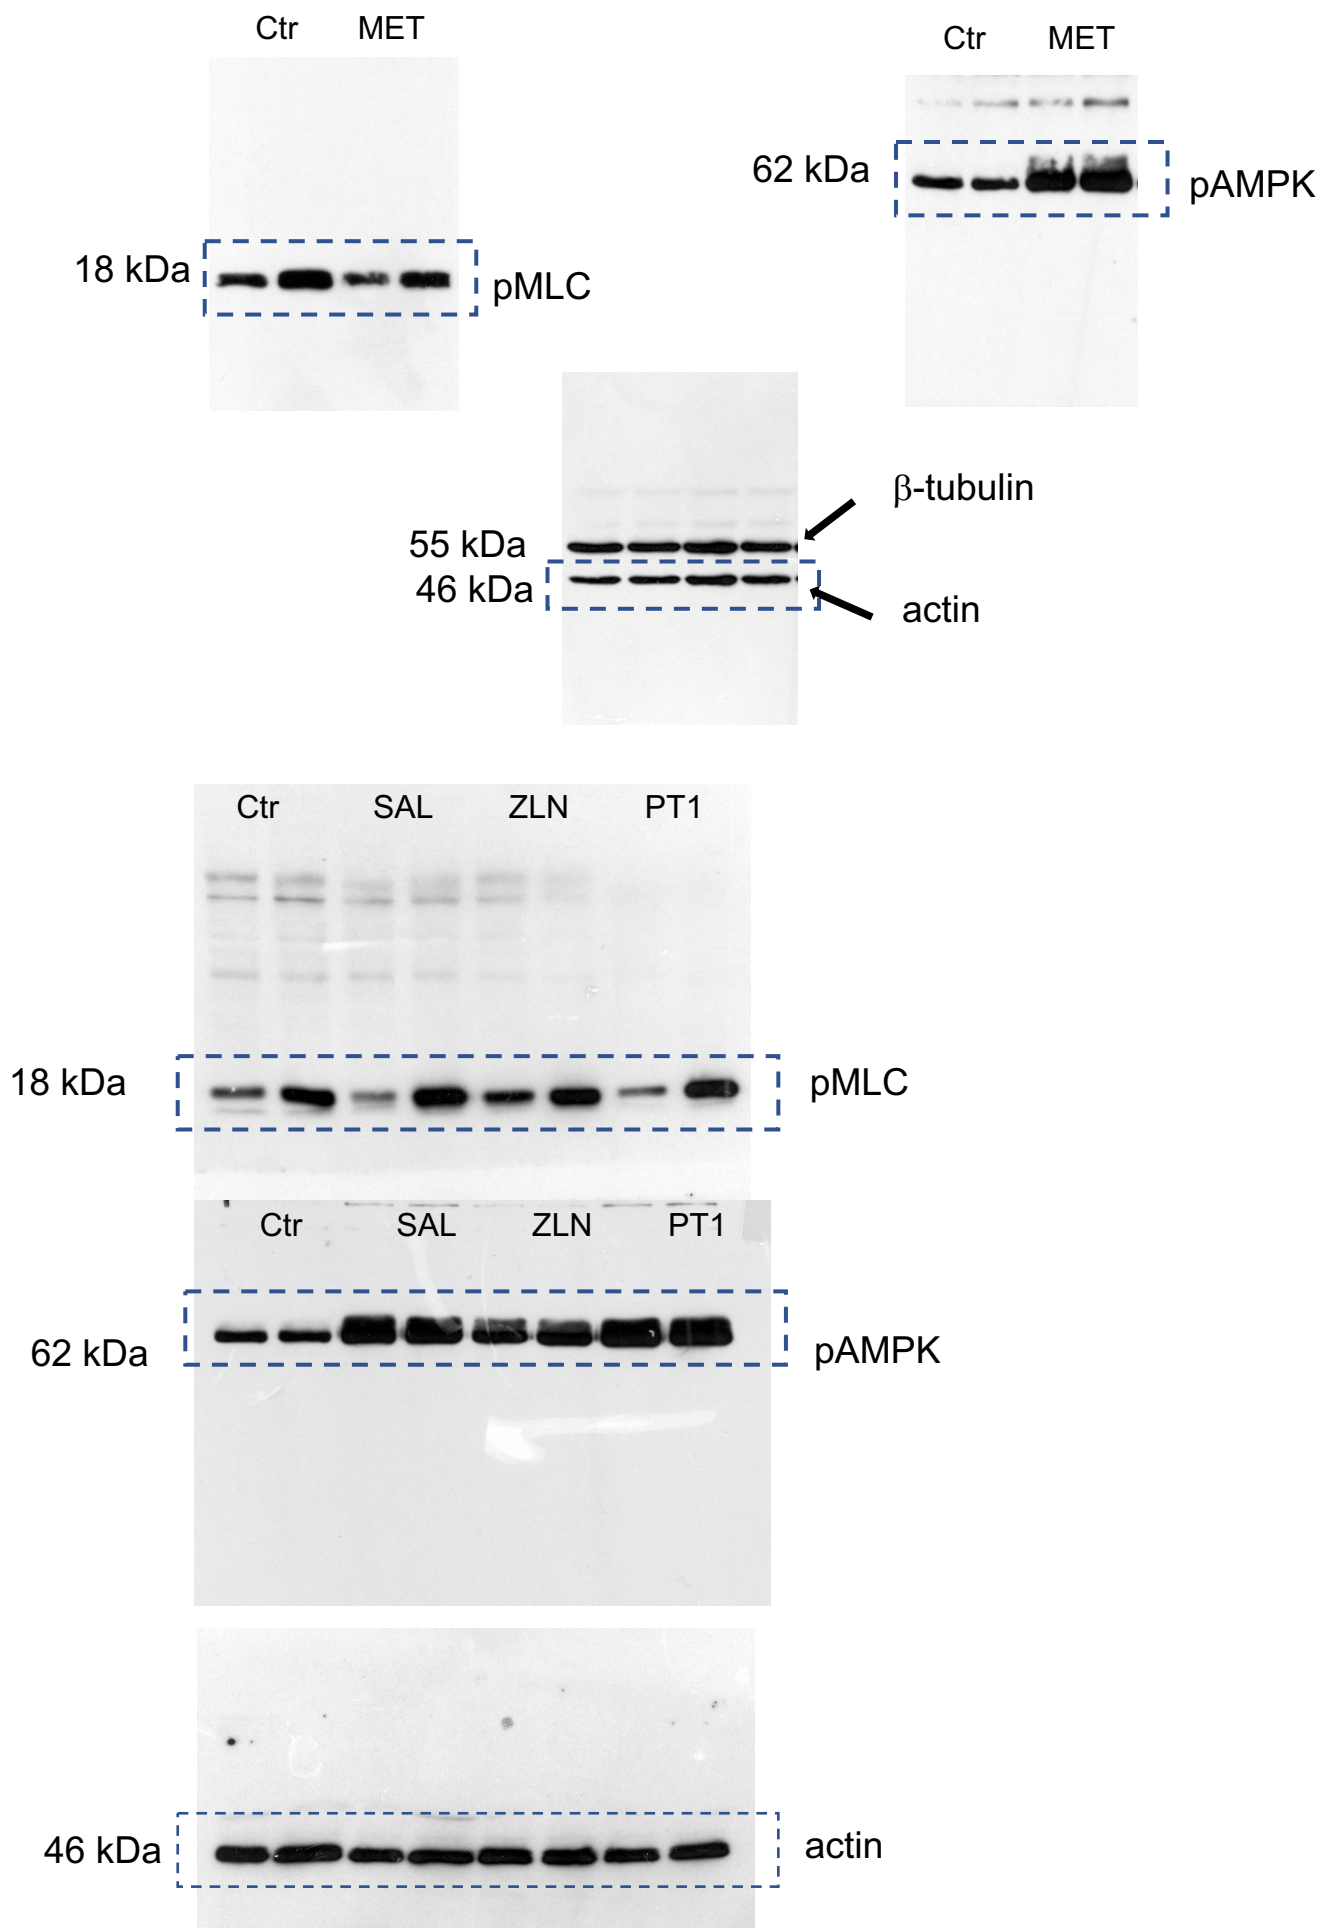

Figure 8a

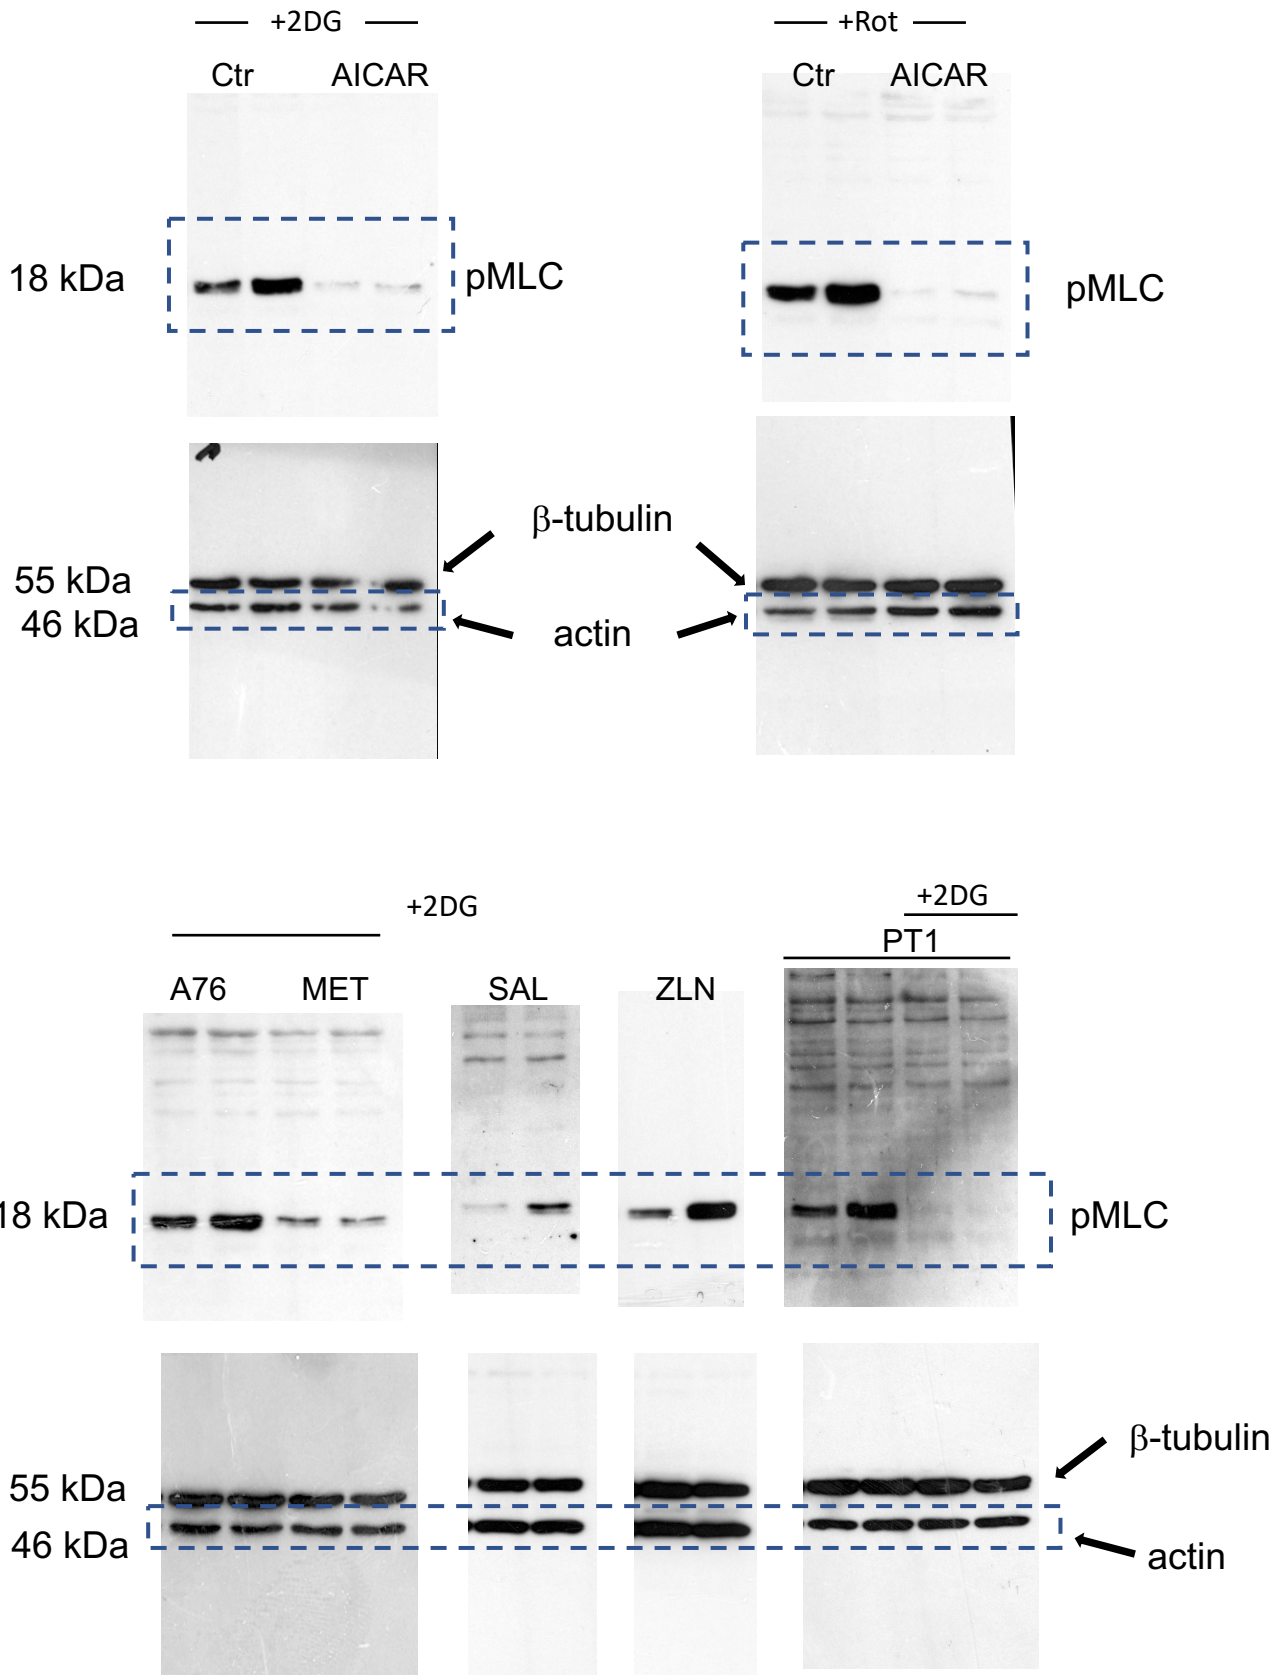

Supplement: 41598_2020_66568_MOESM1_ESM.pdf [file 41598_2020_66568_MOESM1_ESM.pdf]
